# Supplementary material for: Complex Diagnostics of Non-Specific Intellectual Developmental Disorder
Source: Int J Mol Sci. 2022 Jul 14;23(14):7764. doi: 10.3390/ijms23147764 (PMC9323143; doi:10.3390/ijms23147764)
Supplement: Supplementary file 1 [file ijms-23-07764-s001.zip › Supplementary Table S1.xlsx]

## Sheet: General
Table S1. The list of variants of unknown significance.
DNA No.	Gender	Age	Final molecular diagnosis	VUS	GRCh37	Transcript (:c.)	Protein (:p.)	Segregation	Pathogenicity
D156	f	3	No	RBPJ	NC_000004.11:g.26422174A>G	NM_015874.6:c.323A>G	NP_056958.3:p.(Asn108Ser)	maternal	Likely benign
D161	m	3	No	HIVEP2	NC_000006.11:g.143093489C>A	NM_006734.4:c.2387G>T	NP_006725.3:p.(Gly796Val)	maternal	VUS
D165	m	9	No	PIGN	NC_000018.9:g.59774218C>G	NM_176787.5:c.1674+1G>C	NP_789744.1:p.?	paternal	Pathogenic
				PIGN	NC_000018.9:g.59828420G>A	NM_176787.5:c.167C>T	NP_789744.1:p.(Ala56Val)	maternal	VUS
D167	f	6	No	VWA3B	NC_000002.11:g.98737874G>T	NM_144992.5:c.655G>T	NP_659429.4:p.(Glu219Ter)	not tested	Likely benign
				VWA3B	NC_000002.11:g.98779397G>A	NM_144992.5:c.1072G>A	NP_659429.4:p.(Val358Met)	not tested	Likely benign
D170	m	5	No	SYNE1	NC_000006.11:g.152545715G>A	NM_182961.4:c.21436C>T	NP_892006.3:p.(Leu7146Phe)	maternal	VUS
				SYNE1	NC_000006.11:g.152652991C>T	NM_182961.4:c.12829G>A	NP_892006.3:p.(Ala4277Thr)	paternal	VUS
D187	m	16	No	GRIP1 homo	NC_000012.11:g.66838406T>C	NM_001366722.1:c.1645A>G	NP_001353651.1:p.(Ile549Val)	maternal+paternal	VUS
D193	m	9	No	MED12	NC_000023.10:g.70338642C>T	NM_005120.3:c.38C>T	NP_005111.2:p.(Pro13Leu)	maternal, not detected in afffected brother	VUS
D254	f	4.5	MRD type 31	CDON	NC_000011.9:g.125864767G>A	NM_001378964.1:c.2543C>T	NP_001365893.1:p.(Thr848Met)	maternal	Likely benign
				TRIO	NC_000005.9:g.14297356A>G	NM_007118.4:c.1352A>G	NP_009049.2:p.(His451Arg)	maternal	Likely benign
				SETBP1	NC_000018.9:g.42529852G>C	NM_015559.3:c.547G>C	NP_056374.2:p.(Glu183Gln)	not maternal, father not tested	VUS
D275	f	5	No	PIEZO1	NC_000016.9:g.88799088A>G	NM_001142864.4:c.2717T>C	NP_001136336.2:p.(Leu906Pro)	paternal	Likely benign
				PIEZO1	NC_000016.9:g.88789709C>T	NM_001142864.4:c.4363G>A	NP_001136336.2:p.(Ala1455Thr)	paternal	Likely benign
D278	m	5	No	FBXO28	NC_000001.10:g.224318177del	NM_015176.4:c.271del	NP_055991.1:p.(Cys91ValfsTer12)	maternal	Likely benign
D285	m	2	No	IQSEC2	NC_000023.10:g.53263856G>A	NM_001111125.3:c.4012C>T	NP_001104595.1:p.(Arg1338Trp)	maternal	VUS
				CHD6	NC_000020.10:g.40141575T>G	NM_032221.5:c.762A>C	NP_115597.3:p.(Lys254Asn)	not tested	VUS
D324	f	4	No	NRXN2	NC_000011.9:g.64427912T>A	NM_015080.4:c.2281A>T	NP_055895.1:p.(Met761Leu)	maternal, not detected in afffected brother	Likely benign
D335	m	9	No	SETBP1	NC_000018.9:g.42618464_42618466delinsTAT	NM_015559.3:c.4015_4017delinsTAT	NP_056374.2:p.(His1339Tyr)	not tested	VUS
				ATP7A	NC_000023.10:g.77301825C>T	NM_000052.7:c.4261C>T	NP_000043.4:p.(Pro1421Ser)	not tested	VUS
D362	f	4	18q23 microdeletion 16q23.1q24.3 microduplication syndrome	PPP2R5D	NC_000006.11:g.42977149C>A	NM_006245.4:c.1341C>A	NP_006236.1:p.(Phe447Leu)	maternal	VUS
				SRCAP	NC_000016.9:g.30727463T>C	NM_006662.3:c.2570T>C	NP_006653.2:p.(Ile857Thr)	not tested	VUS
D386	m	6	No	WWC3	NC_000023.10:g.10104728G>A	NM_015691.4:c.2819G>A	NP_056506.2:p.(Arg940Gln)	maternal, grandpaternal	Likely benign
D393	m	3	No	SHANK2	NC_000011.9:g.70803581G>C	NM_012309.5:c.799C>G	NP_036441.2:p.(Pro267Ala)	not tested	VUS
D394	f	0.5	CAG-repeats expansion in ATN1: 20/53	ANKRD11	NC_000016.9:g.89350732T>G	NM_001256182.2:c.2218A>C	NP_001243111.1:p.(Asn740His)	paternal	Likely benign
				TCF4	NC_000018.9:g.52921807G>A	NM_001083962.2:c.1271C>T	NP_001077431.1:p.(Pro424Leu)	maternal	Likely benign
D421	m	1	No	RFX3	NC_000009.11:g.3293156C>T	NM_134428.3:c.652G>A	NP_602304.1:p.(Asp218Asn)	paternal	VUS
D422	f	4	No	ASXL3	NC_000018.9:g.31325861C>A	NM_030632.3:c.6049C>A	NP_085135.1:p.(Pro2017Thr)	not tested	VUS
				A2ML1	NC_000012.11:g.9000212C>G	NM_144670.6:c.1751C>G	NP_653271.3:p.(Ala584Gly)	not tested	VUS
D423	m	8	No	SCN1A	NC_000002.11:g.166929888G>A	NM_001165963.4:c.244C>T	NP_001159435.1:p.(Pro82Ser)	not tested	VUS
D472	f	2.5	No	SCN2A	NC_000002.11:g.166229747A>G	NM_021007.3:c.3862A>G	NP_066287.2:p.(Ser1288Gly)	maternal	Likely benign
				CRH	NC_000008.10:g.67089624G>C	NM_000756.4:c.89C>G	NP_000747.1:p.(Pro30Arg)	not tested	Likely benign
				ITPR1	NC_000003.11:g.4741533T>C	NM_002222.7:c.4372T>C	NP_002213.5:p.(Ser1458Pro)	paternal	Likely benign
D485	m	7.5	No	AHDC1	NC_000001.10:g.27875856C>T	NM_001029882.3:c.2771G>A	NP_001025053.1:p.(Gly924Glu)	maternal	Likely benign
				GABRB1	NC_000004.11:g.47408909A>G	NM_000812.4:c.1046A>G	NP_000803.2:p.(Asn349Ser)	paternal	Likely benign
				STAG1	NC_000003.11:g.136060377A>T	NM_005862.3:c.3463T>A	NP_005853.2:p.(Ser1155Thr)	not tested	VUS
D488	m	7.5	No	ASXL3	NC_000018.9:g.31325919C>T	NM_030632.3:c.6107C>T	NP_085135.1:p.(Pro2036Leu)	maternal, grandpaternal	VUS
D509	m	4.5	No	GRIN2A	NC_000016.9:g.10273946G>A	NM_000833.5:c.323C>T	NP_000824.1:p.(Ala108Val)	not tested	VUS
D512	m	7.5	No	AFF2	NC_000023.10:g.148037272T>A	NM_002025.4:c.1697T>A	NP_002016.2:p.(Met566Lys)	maternal	VUS
				SETD2	NC_000003.11:g.47098660T>C	NM_014159.7:c.6614A>G	NP_054878.5:p.(His2205Arg)	not tested	VUS
				DCC	NC_000018.9:g.50994335C>T	NM_005215.4:c.3691C>T	NP_005206.2:p.(Arg1231Trp)	not tested	VUS
D517	f	4.5	No	CTNNB1	NC_000003.11:g.41266924G>T	NM_001904.4:c.595G>T	NP_001895.1:p.(Val199Leu)	paternal	Likely benign
D535	f	2.5	No	ATP6V1B2	NC_000008.10:g.20070366G>A	NM_001693.4:c.877G>A	NP_001684.2:p.(Val293Ile)	not tested	VUS
D536	f	1	No	PDGFRB	NC_000005.9:g.149512383C>G	NM_002609.4:c.1057G>C	NP_002600.1:p.(Asp353His)	maternal	Likely benign
D547	m	7	No	DIAPH2	NC_000023.10:g.96502777G>A	NM_006729.5:c.2783G>A	NP_006720.1:p.(Arg928His)	maternal	VUS
				ULK4	NC_000003.11:g.41841740del	NM_017886.4:c.1894del	NP_060356.2:p.(Val632SerfsTer17)	maternal	Likely benign
D556	f	3.5	No	MBD5	NC_000002.11:g.149226758C>T	NM_018328.5:c.1246C>T	NP_060798.2:p.(His416Tyr)	paternal	Likely benign
D565	f	7.5	No	KAT6A	NC_000008.10:g.41836214C>T	NM_006766.5:c.989G>A	NP_006757.2:p.(Arg330His)	maternal	Likely benign
				ADAT3	NC_000019.9:g.1912429G>T	NM_138422.4:c.383G>T	NP_612431.2:p.(Arg128Leu)	maternal	VUS
				ADAT3	NC_000019.9:g.1912597A>G	NM_138422.4:c.551A>G	NP_612431.2:p.(Gln184Arg)	paternal	VUS
D600	f	2	16q22.3-q21.3 microdelition syndrome	BDH1	NC_000003.11:g.197260386G>A	NM_004051.5:c.130C>T	NP_004042.1:p.(Arg44Trp)	paternal	Likely benign
				BDH1	NC_000003.11:g.197238841G>C	NM_004051.5:c.957C>G	NP_004042.1:p.(Asp319Glu)	paternal	Likely benign
				CDK13	NC_000007.13:g.39990509A>G	NM_003718.5:c.269A>G	NP_003709.3:p.(Lys90Arg)	maternal	Likely benign
D605	f	3	No	ASH1L	NC_000001.10:g.155450655A>G	NM_018489.3:c.2006T>C	NP_060959.2:p.(Val669Ala)	paternal	Likely benign
				SP4	NC_000007.13:g.21516807C>T	NM_003112.5:c.1789C>T	NP_003103.2:p.(Gln597Ter)	maternal	Likely benign
D614	m	6	No	CYFIP2	NC_000005.9:g.156734839G>T	NM_001037333.3:c.866G>T	NP_001032410.1:p.(Arg289Ile)	maternal	Likely benign
D619	m	4.5	No	CDH15	NC_000016.9:g.89259918G>C	NM_004933.3:c.1896G>C	NP_004924.1:p.(Lys632Asn)	not tested	VUS
				SRCAP	NC_000016.9:g.30750959A>G	NM_006662.3:c.9598A>G	NP_006653.2:p.(Thr3200Ala)	not tested	VUS
D677	m	5.5	No	SHROOM4	NC_000023.10:g.50351062A>T	NM_020717.4:c.3080T>A	NP_065768.2:p.(Phe1027Tyr)	maternal	VUS
				RERE	NC_000001.10:g.8420296C>A	NM_012102.4:c.3271G>T	NP_036234.3:p.(Val1091Phe)	maternal	Likely benign
D693	m	11	No	KMT2E	NC_000007.13:g.104751050G>T	NM_182931.3:c.3970+1G>T	NP_891847.1:p.?	maternal	Likely benign
				ATP11C	NC_000023.10:g.138857110A>C	NM_001010986.3:c.1964T>G	NP_001010986.2:p.(Leu655Arg)	maternal, grandmaternal	VUS
D697	m	4.5	No	DCHS1	NC_000011.9:g.6653747C>T	NM_003737.4:c.2996G>A	NP_003728.1:p.(Arg999Gln)	maternal	Likely benign
				DCHS1	NC_000011.9:g.6648767G>A	NM_003737.4:c.5503C>T	NP_003728.1:p.(Leu1835Phe)	paternal	VUS
D727	m	6.5	No	PIEZO2	NC_000018.9:g.10696286T>C	NM_022068.4:c.6637A>G	NP_071351.2:p.(Lys2213Glu)	paternal	Likely benign
				RERE	NC_000001.10:g.8418705G>A	NM_012102.4:c.3890C>T	NP_036234.3:p.(Pro1297Leu)	maternal	Likely benign
D752	m	8	No	SZT2	NC_000001.10:g.43912663G>A	NM_015284.4:c.8939G>A	NP_056099.3:p.(Arg2980Gln)	not tested	VUS
				SZT2	NC_000001.10:g.43914298A>T	NM_015284.4:c.9814A>T	NP_056099.3:p.(Met3272Leu)	not tested	VUS
				CHL1 homo	NC_000003.11:g.419500G>C	NM_006614.4:c.1752-1G>C	NP_006605.2:p.?	healthy sister homozygous	Likely benign
D766	m	11	No	PACS2	NC_000014.8:g.105814906G>T	NM_001100913.3:c.196G>T	NP_001094383.2:p.(Val66Phe)	not tested	VUS
D809	m	9	No	CHD3	NC_000017.10:g.7797119del	NM_001005271.3:c.971-4del	NP_001005271.2:p.?	maternal	Likely benign
D834	f	13	No	NTRK2	NC_000009.11:g.87570364G>C	NM_006180.6:c.2104G>C	NP_006171.2:p.(Glu702Gln)	maternal	Likely benign
D841	m	29	No	ACTL6B	NC_000007.13:g.100244707C>A	NM_016188.5:c.823G>T	NP_057272.1:p.(Val275Leu)	maternal	VUS
D847	m	3	No	DCC	NC_000018.9:g.50866263C>G	NM_005215.4:c.2345C>G	NP_005206.2:p.(Ser782Cys)	maternal	Likely benign
				HUWE1	NC_000023.10:g.53581717C>G	NM_031407.7:c.8371G>C	NP_113584.3:p.(Ala2791Pro)	maternal	VUS
D850	m	4	No	FGFR2	NC_000010.10:g.123276974C>T	NM_000141.5:c.943G>A	NP_000132.3:p.(Ala315Thr)	not tested	VUS
				SPTAN1	NC_000009.11:g.131339776A>G	NM_001130438.3:c.1076A>G	NP_001123910.1:p.(Asp359Gly)	not tested	VUS
				ZMIZ1	NC_000010.10:g.81056401G>T	NC_000010.10:g.81056401G>T	NP_065071.1:p.(Gln468His)	not tested	VUS
D852	f	3	No	ATRX	NC_000023.10:g.76937959C>G	NM_000489.6:c.2789G>C	NP_000480.3:p.(Ser930Thr)	paternal	Likely benign
D856	f	5.5	10q26.3 microdeletion syndrome	GLDC	NC_000009.11:g.6587268C>T	NM_000170.3:c.1723G>A	NP_000161.2:p.(Glu575Lys)	maternal	VUS
				GLDC	NC_000009.11:g.6554754C>T	NM_000170.3:c.2230G>A	NP_000161.2:p.(Gly744Arg)	paternal	VUS
D864	m	14	No	NSD1	NC_000005.9:g.176637928A>G	NM_022455.5:c.2528A>G	NP_071900.2:p.(His843Arg)	maternal	Likely benign
D876	m	4.5	No	NF2	NC_000022.10:g.30077444A>G	NM_000268.4:c.1591A>G	NP_000259.1:p.(Lys531Glu)	maternal	VUS
D883	m	5.5	No	SETD1A	NC_000006.11:g.143093645A>G	NM_006734.4:c.2231T>C	NP_006725.3:p.(Met744Thr)	maternal	Likely benign
				HIVEP2	NC_000016.9:g.30976459G>A	NM_014712.3:c.1396G>A	NP_055527.1:p.(Ala466Thr)	paternal	Likely benign
D894	m	10	No	SCN8A	NC_000012.11:g.52139765C>T	NM_014191.4:c.2077C>T	NP_055006.1:p.(Arg693Trp)	paternal	VUS
D895	m	11	No	RERE	NC_000001.10:g.8601362G>C	NM_012102.4:c.741C>G	NP_036234.3:p.(Ile247Met)	paternal	Likely benign
				SYNE1	NC_000006.11:g.152806077T>C	NC_000006.11:g.152806077T>C	NP_149062.2:p.(Met367Val)	paternal	VUS
				SYNE1	NC_000006.11:g.152510428C>T	NM_033071.4:c.23047G>A	NP_149062.2:p.(Val7683Ile)	maternal	VUS
D918	m	6	No	SETBP1	NC_000018.9:g.42618528C>A	NM_015559.3:c.4079C>A	NP_056374.2:p.(Thr1360Asn)	maternal	Likely benign
D941	m	4	No	PKN2	NC_000001.10:g.89270074T>A	NM_006256.4:c.1282T>A	NP_006247.1:p.(Ser428Thr)	paternal	Likely benign
				TSC2	NC_000016.9:g.2104404C>A	NM_000548.5:c.444C>A	NP_000539.2:p.(Asp148Glu)	maternal	Likely benign
D966	m	9	No	PDGFRB	NC_000005.9:g.149510171G>C	NM_002609.4:c.1298C>G	NP_002600.1:p.(Thr433Arg)	paternal	VUS
				CDK13	NC_000007.13:g.39990616C>T	NM_003718.5:c.376C>T	NP_003709.3:p.(Pro126Ser)	maternal	Likely benign
D985	m	5	No	FOXP2	NC_000007.13:g.114268680C>T	NM_014491.4:c.344C>T	NP_055306.1:p.(Pro115Leu)	not tested	VUS
D1011	f	10	8p23.3p23.1 microdeletion sybdrome	CREBBP	NC_000016.9:g.3807815G>A	NM_004380.3:c.3604C>T	NP_004371.2:p.(Arg1202Cys)	not tested	Likely benign
D1038	m	6	No	MECP2	NC_000023.10:g.153296827T>G	NM_004992.4:c.452A>C	NP_004983.1:p.(Asp151Ala)	maternal	VUS
				SETD1A	NC_000016.9:g.30976254T>A	NM_014712.3:c.1191T>A	NP_055527.1:p.(Phe397Leu)	paternal	Likely benign
